# Supplementary material for: The evolution, distribution and diversity of endogenous circoviral elements in vertebrate genomes
Source: PubMed Central journal article supplement (PMC6372831; doi:10.1016/j.virusres.2018.03.014), 2019-03

a)

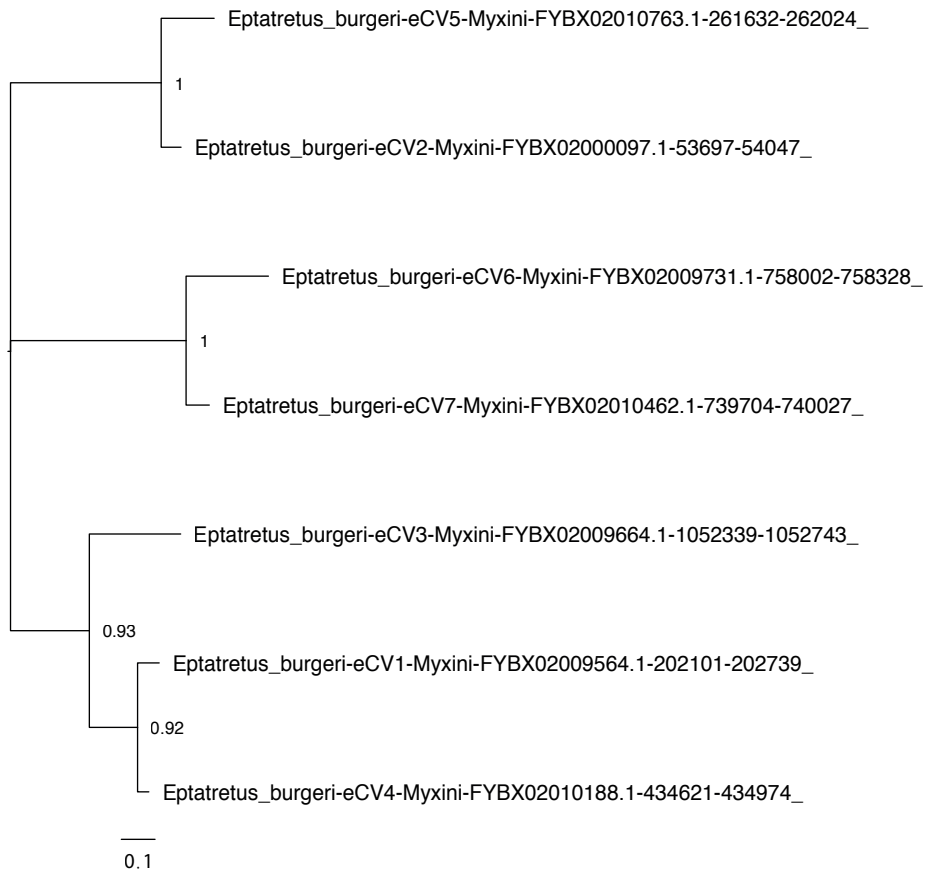

b)

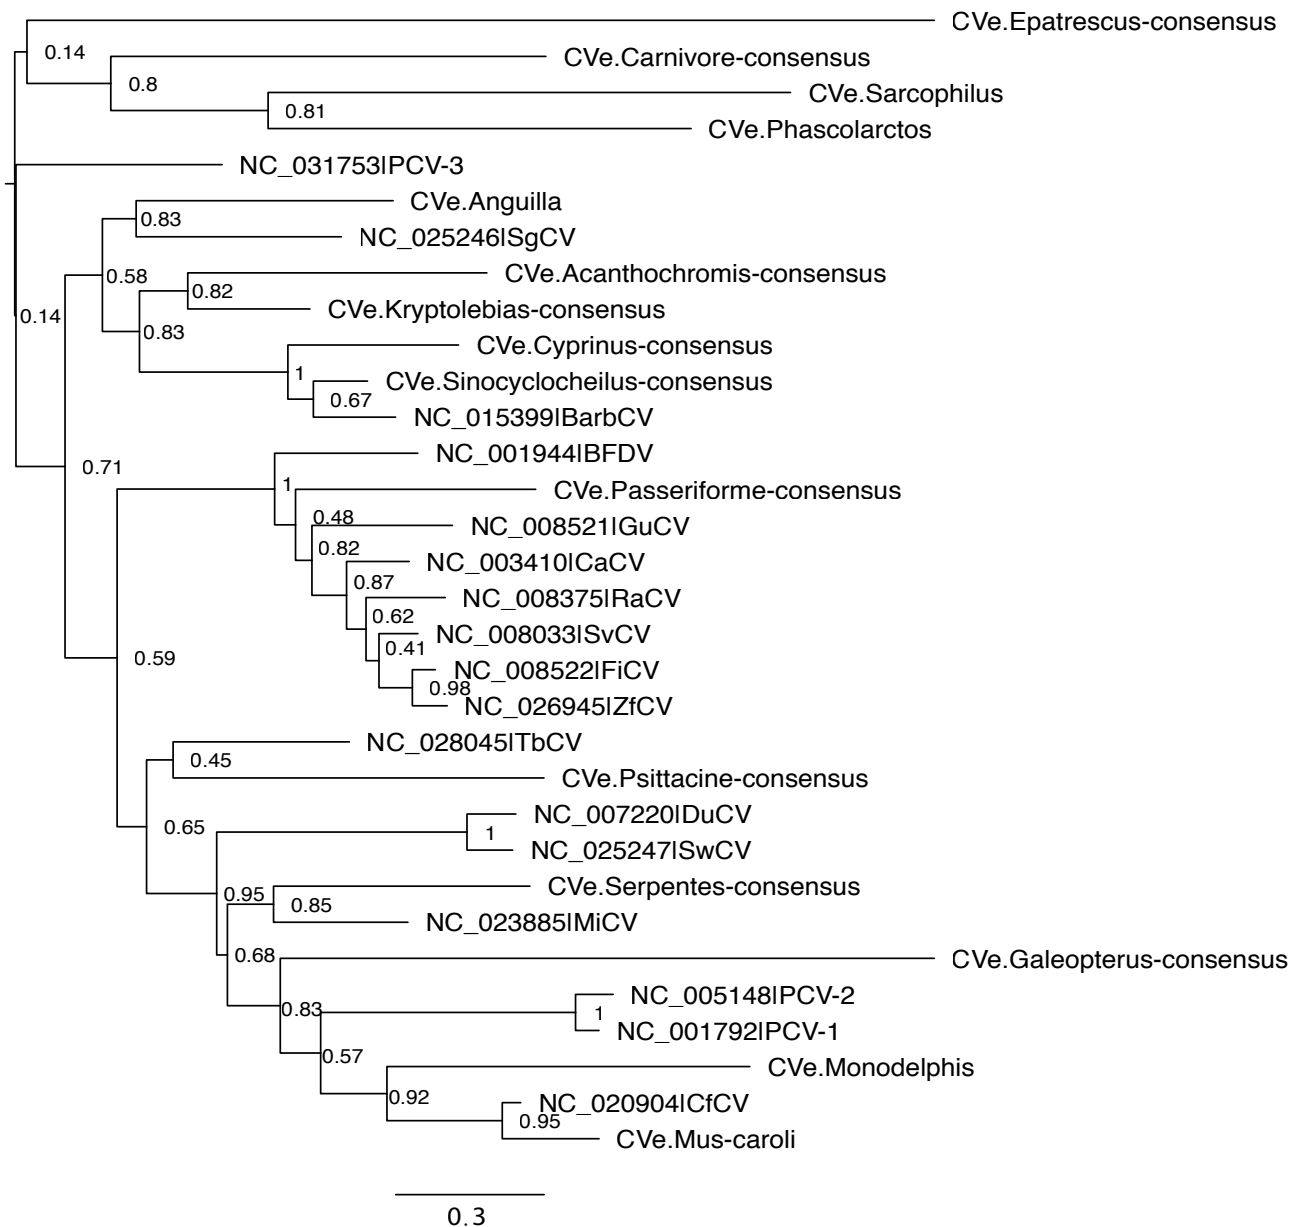

Supplement: mmc2.pdf [file mmc2.pdf]
