# Supplementary material for: The evolution, distribution and diversity of endogenous circoviral elements in vertebrate genomes
Source: PubMed Central journal article supplement (PMC6372831; doi:10.1016/j.virusres.2018.03.014), 2019-03
Supplement: mmc3.pdf [file mmc3.pdf]

**Figure S2.**

|              |       |                                                                |       |
|--------------|-------|----------------------------------------------------------------|-------|
| LVCR01008418 | 35550 | IPA IENMQLAGHPCKRYVFTINNPESEEDYDAVKDFITPENCVYAIVGEEQVSTLHLQGFV | 35729 |
| JPMF01009165 | 2134  | IPA IENMQLAGHPCKRYVFTINNPESEEDYDAVKDFITPENCVYAIVGEEQVSTLHLQGFV | 2313  |
| LVCR01005637 | 76800 | IETMQLAGHPCKRYVFTINNPESEEDYDAVKDFITPENCVYAIVGEEQVSTLHLQGFV     | 76630 |
| JPMF01099474 | 4867  | IKT MQLAGHPCK*YVFTINNPESEEDYDAVKDFITPENCVYAIVGEEQVSTLHLQGFV    | 5037  |
| JPMF01327854 | 107   | LASFV                                                          | 121   |
| JPMF01327854 | 21    | KDYTAVKDFIIPENCVYAIVGEEQVSTLHLQALL                             | 122   |
| LVCR01018124 | 48796 | SEEDYNAVKDFITPENCVYAIVGEEQVCVYAIVG                             | 48897 |
| JPMF01003018 | 2944  | SKEDYNAVKDFITPKNCVYAIVGEEQVCVYTI VG                            | 2843  |
|              |       |                                                                |       |
| LVCR01008418 | 35730 | NLKKKMRFNPFKAAIGGRAHVEKAKRTDLNKRKRYCSKQKVYLEVGEPSAQGKRLDLKEAI  | 35909 |
| JPMF01009165 | 2314  | NLKKKMRFNPFKAAIGGRAHVEKAKGTDLDNKRKRYCSKQKVYLEVAEPSAQGKRLDLKEAI | 2493  |
| JPMF01024207 | 6477  | TAQEKRSDLKEAI                                                  | 6515  |
| LVCR01005637 | 76629 | NLKKKMRFNPFKAAV                                                | 76585 |
| JPMF01099474 | 5038  | NLKKKMRFNPFKAAV                                                | 5082  |
| JPMF01327854 | 122   | NLKKKMRFNPFKAAIGGRAHIEQAKGTNLDNKTYCSKQKLVYQEG                  | 256   |
| AEQU02103080 | 78    | QEKEEFIVVKEMLGGRAHLEKTKGTDLNQT YCCKGGDFIEISESSKLGKRNLDNAV      | 251   |
|              |       |                                                                |       |
| LVCR01008418 | 35910 | ALLNSGSSMTELAQAYPSVYIRYGRGL-----KDYVITAQLTRMRDFKTDVHVITGIPGC   | 36074 |
| JPMF01009165 | 2494  | ALLNSGSSMTELAQAYPSVYIRYGRGL-----KDYVITAQLARMRDFKTDVHVITGIPGC   | 2658  |
| JPMF01192303 | 58    | AQLTKMRDFKTEVHVIMGIPRC                                         | 123   |
| LVCR01015089 | 21904 | AQLAKMRDFKTEVHVITGIPGC                                         | 21839 |
| JPMF01024207 | 6516  | ALLNSGSSMTELARAYPSVYIRYGMGL-----IDYVITAQLAKMRDFKTDVHVITGIPGC   | 6680  |
| AEQU02103080 | 252   | EQLH                                                           | 263   |
| AEQU02103080 | 266   | NLTEVAHEYPATFIKYGHALVCTYVRYVI                                  | 355   |
|              |       |                                                                |       |
| LVCR01008418 | 36075 | GKSKFCSELDGDKYWKPRGKWWDG YTGQEI--VILDD-FYGWL-P----FDELLRCDRY   | 36230 |
| JPMF01009165 | 2659  | GKSKFYSELDGDKYWKPRGKWWDG YTGQEI--VILDD-FYGWL-P----FDKLLRCDRY   | 2814  |
| JPMF01192303 | 124   | GKSKFCNELEGEKYWKPRGKWWDG YTGQEI--VILDD-YYGWL-P----FDELLRCDRY   | 279   |
| LVCR01015089 | 21838 | GKSKFCNELEGEKYWKPRGKWWDG YTGQEI--VILDD-YYGWL-P----FDELLRCDRY   | 21683 |
| JPMF01024207 | 6681  | GKSKFCSELDGDKYWKPHGKWWDG YTGQEI--VILDD-FYGWI-P----FDELLRCDRY   | 6836  |
| LVCR01091779 | 7273  | LLNLCLRV                                                       | 7296  |
| BCNE02020765 | 4847  | DD-FYGWLLP----FDELLRVCDRY                                      | 4906  |
| BCNE02020767 | 1611  | DD-FYGWLLP----FDELLRVCDRY                                      | 1670  |
| BCNE02075733 | 4046  | WDGYFGQKV--AITDDFFYGWI-PRMNCWD*GINI---H                        | 4144  |
| LVCR01061408 | 7929  | WDGYSGQKV--AITDDFFYGLD-T----TDEL*GLTDKY                        | 8024  |
| AZIM01004063 | 27509 | WDGYSGQKVGNKYMI F-LKKWLD T----TDESLGLMDKY                      | 27610 |
|              |       |                                                                |       |
| LVCR01008418 | 36231 | PYRVET---KDGTFEVS KCIYITSNKPVKWEYDEDIHT---ET                   | 36344 |
| JPMF01009165 | 2815  | PYRVET---KGGTMEFVSKCIYITSKQ                                    | 2886  |
| JPMF01223472 | 1153  | RVET---KGGTVEFVSKSIYITSNKPVKWEYSEYCL---EALFRRITSYKIMRKGE G     | 998   |
| JPMF01192303 | 280   | PYRVET---KGGTVEFVSKTIYITSNKPVKWEYNEEYCL---EALFRRITSYKIMRKGE G  | 441   |
| LVCR01015089 | 21682 | PYRVET---KGGTIEFVSKTIYITSNKPVKWEYNEEYCL---EALFRRITSYKIMRKGE G  | 21521 |
| JPMF01024207 | 6837  | SYRVET---KGGTMEFVSKSI                                          | 6890  |
| LVCR01091779 | 7297  | YISLQTNL*KSGIVRSIVLRHCL EESLHTK*EKEKGCLIKCQLYFQSIVKYIHMEK---   | 7467  |
| LVCR01091779 | 7251  | RVET---KGGTVEFVSKSIYITSNKPVKWEYSEYCL---EALFRRITSYKIMRKGE G     | 7406  |
| BCNE02045840 | 57610 | IRRITSYKIMRKGE G                                               | 57566 |
| BCNE02020765 | 4908  | PTELRF---RGATMEFVSKKIYITSNKPVKWEYGE EECM---QALFRRITTYQIMTTGEG  | 5069  |
| BCNE02020765 | 4907  | PYRVET---KGGN                                                  | 4936  |
| BCNE02020767 | 1672  | PTELRF---RGATMEFVSTKIYITSNKPVKWEYGE EECM---QALFRRITTYQIM-TTEG  | 1830  |
| BCNE02020767 | 1671  | PYRVET---KGGN                                                  | 1700  |
| BCNE02075733 | 4145  | LTKWQV---KGSFQEFVSKKI                                          | 4198  |
| LVCR01061408 | 8025  | P                                                              | 8027  |
| AZIM01004063 | 27611 | PPKWQV---QGSFQEFVSKTINCPTN                                     | 27679 |
|              |       |                                                                |       |
| LVCR01008418 | 35113 | TFWDIHTETKTPVE-                                                | 35072 |
| LVCR01008418 | 36327 | DIHTETKTPVE-                                                   | 36359 |
| JPMF01009165 | 2909  | EDIHTETKTPVE-                                                  | 2944  |
| JPMF01009165 | 1715  | TFWDIHTETKTPVE-                                                | 1674  |
| JPMF01223472 | 997   | MSDKMPTLFPINC*VHTHGKKNFSELNIVCDFY*P*VSNWLGGCETFRNIHAETKTPVEY   | 818   |
| JPMF01192303 | 442   | MSDKIPTLFPINC*ACV--HGKINSLN*T-*YVIL*VLYWLGSTETFWDIHSSAQ        | 597   |
| LVCR01015089 | 21520 | MSDKIP                                                         | 21503 |
| LVCR01015089 | 21464 | KNKFSSELNIVCYLY*P*VLYWLGSTETFWDIHSSAQ                          | 21357 |
| LVCR01091779 | 7468  | -----INSLNIVCDFY*P*VSNWLGGCETFRNIHAETKTPVEY                    | 7581  |
| LVCR01091779 | 7407  | MSDKMPTLFPINC*VHTHGKKNFSEHSM                                   | 7490  |
| BCNE02045840 | 57527 | LSTSTW-----KNKLSSELNIVCFE FN*PAVLYRFLQHSALRYIYTESQTPVD-        | 57390 |
| BCNE02045840 | 57565 | MSDKVP                                                         | 57548 |
| JPMF01223473 | 3243  | KNKFSSELNIVCDFYK*PVLYWLGSS ETLWNIHTE SKPPVEH                   | 3121  |
| BCNE02020765 | 5070  | LKDKMP                                                         | 5087  |
| BCNE02020767 | 1831  | LKDKMP                                                         | 1848  |
| JPMF01156588 | 204   | ARLNIVCYLY*P*VLYWLGST EAF*NIIHAESKSPMEH                        | 314   |
| BCNE02035370 | 8539  | ESQAPV*H                                                       | 8562  |
| JTLQ01205518 | 1347  | KYKFSELQVVCYFYIP*IGYIIS-----RYIHRQT*PI MG*                     | 1454  |

|              |       |                                                                 |                              |       |
|--------------|-------|-----------------------------------------------------------------|------------------------------|-------|
| LVCR01008418 | 36448 |                                                                 | IIN*LGFGGEVS*VVS*EYPVVS*LVHE | 36534 |
| LVCR01008418 | 35071 | -NLVIAVEPELVVFAVWLEED*ARGGGGGCIINHLEFG                          |                              | 34958 |
| LVCR01008418 | 36360 | -NLVIAVEPELVVFAVWLEED*TRGW                                      |                              | 36437 |
| JPMF01009165 | 3033  |                                                                 | IIN*LGFGGEVS*VVS*EYPVVS*LVHE | 3119  |
| JPMF01009165 | 2945  | -NLVIAVEPELVVFAVWLEEN*TR                                        |                              | 3016  |
| JPMF01009165 | 1673  | -NLVIAVEPELVVFAVWLEE-----D*VWGGG                                |                              | 1593  |
| JPMF01223472 | 817   | IS--IFGIEPKLIIFIVWLEEC*FLDCCCALDIRELWFGCEVS*VVSVDVVC**SIHK      |                              | 644   |
| LVCR01091779 | 7582  | IS--IFGIEPKLIIFIVWLEEC*FLDCCCALDIRELWFGCEVS*VVSVDVVC**SIHK      |                              | 7755  |
| BCNE02045840 | 57389 | -NVVIIGIDPHLVIFIVGLEK--QRPLWCGFVSNQLWFWGEIS*VVSVEYVVC*SVHK      |                              | 57219 |
| JPMF01223473 | 3120  | --GVIITI*P*LIIFIIWLEEEGPRG--CGFVLDQLGIGGEVS*VVSVDVVC*PVLK       |                              | 2953  |
| BCNE02032238 | 3796  | TVEKVGIEPKLVVF*IWLEE--HRSSWCHGVIDQLGFGGEVS*VWSGKDPVVCVGSVHE     |                              | 3626  |
| JPMF01333966 | 283   |                                                                 | IIN*LGFGGEVS*VVS*EYPVVS*LVHE | 197   |
| JPMF01156588 | 315   | --GVIITIKPQLIIFIIWLEEEGPRG--CGLVCYDLGFGG                        |                              | 422   |
| BCNE02035370 | 8563  | --GVIIGVEPELVVLAFLVWLEEH*SR--WGDITISYLLWFWGEVS*VISVEDPIMSCRSIHE |                              | 8730  |
| JTLQ01205518 | 1455  | I--ISFRI*PELIIFVIWLKP--FTSWW                                    |                              | 1526  |

|              |       |                                                   |       |
|--------------|-------|---------------------------------------------------|-------|
| LVCR01008418 | 36535 | GVLRG*SGPWGW*VSIKINNSGSSGYFFM*VKKGGQKFNFDLSDSIVIP | 36681 |
| JPMF01009165 | 3120  | GVLRG*SGPWGW*VSIKINNSGSSGCFM*VKKGGQKFNFDLSDSIVIP  | 3266  |
| JPMF01223472 | 643   | WVICCWGGGWCWNIKINNSGSS*VFFL*AQECWEEFNFDLSDSIVIP   | 497   |
| LVCR01091779 | 7756  | WVICCWGGGWCWNIKINNSDSS*VFFL*AQECWEEFNFDLSDSIVIP   | 7902  |
| BCNE02045840 | 57218 | RVIWCHGCPWCW*VSIQINDSGAPRGFFM                     | 57132 |
| JPMF01223473 | 2952  | RVIWCSCCSRLW*VAIKINNSGSSGIFFL*AKKCGKKNFHFSDPTVIP  | 2806  |
| BCNE02032238 | 3625  | WVFR*KGAPW*W*VAFKVNCCSS*GFFM*EQVSWEEFNFDLSDSIVIP  | 3479  |
| JPMF01333966 | 196   | GVLRG*SGPWGW*VSIKINNSGSSGCFM*VKKGGQKFNFDLSDSIVIP  | 50    |
| BCNE02035370 | 8731  | WIFSESSAPWCW*VAIKINNSGSS                          | 8802  |
